# Supplementary material for: Bayesian Data Assimilation of Temperature Dependence of Solid–Liquid Interfacial Properties of Nickel
Source: MDPI journal article supplement (doi:10.3390/nano11092308), 2021-09-06
Supplement: s1 [file s1]

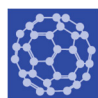

# Bayesian Data Assimilation of Temperature Dependence of Solid–Liquid Interfacial Properties of Nickel

Yuhi Nagatsuma <sup>1</sup>, Munekazu Ohno <sup>2</sup>, Tomohiro Takaki <sup>3</sup> and Yasushi Shibuta <sup>1,\*</sup>

<sup>1</sup> Department of Materials Engineering, The University of Tokyo, Tokyo 113-8656, Japan; nagatsuma-yuhi565@g.ecc.u-tokyo.ac.jp

<sup>2</sup> Division of Materials Science and Engineering, Faculty of Engineering, Hokkaido University, Sapporo 060-8628, Japan; mohno@eng.hokudai.ac.jp

<sup>3</sup> Faculty of Mechanical Engineering, Kyoto Institute of Technology, Kyoto 606-8585, Japan; takaki@kit.ac.jp

\* Correspondence: shibuta@material.t.u-tokyo.ac.jp

**Table S1.** Representative properties of the EAM potential for Ni employed in this study [1,2].

| Property                                                                   | Experiment      | EAM   |
|----------------------------------------------------------------------------|-----------------|-------|
| Lattice constant, $a_0$ (nm)                                               | 0.352           | 0.352 |
| Cohesive energy, $e_0$ (eV)                                                | −4.45           | −4.45 |
| Elastic constants (GPa)                                                    |                 |       |
| $B$                                                                        | 181.0           | 181.0 |
| $c_{11}$                                                                   | 246.5           | 241.3 |
| $c_{12}$                                                                   | 147.3           | 150.8 |
| $c_{44}$                                                                   | 124.7           | 127.3 |
| Vacancy formation energy, $E_v^f$ (eV)                                     | 1.60            | 1.57  |
| Intrinsic stacking fault energy, $\gamma_{\text{SF}}$ (mJ/m <sup>2</sup> ) | 125             | 134   |
| Symmetrical twin boundary energy, $\gamma_{\text{T}}$ (mJ/m <sup>2</sup> ) | 43              | 68    |
| Surface energies (mJ/m <sup>2</sup> )                                      |                 |       |
| (110)                                                                      | 2280* (average) | 2087  |
| (100)                                                                      | 2280* (average) | 1936  |
| (111)                                                                      | 2280* (average) | 1759  |

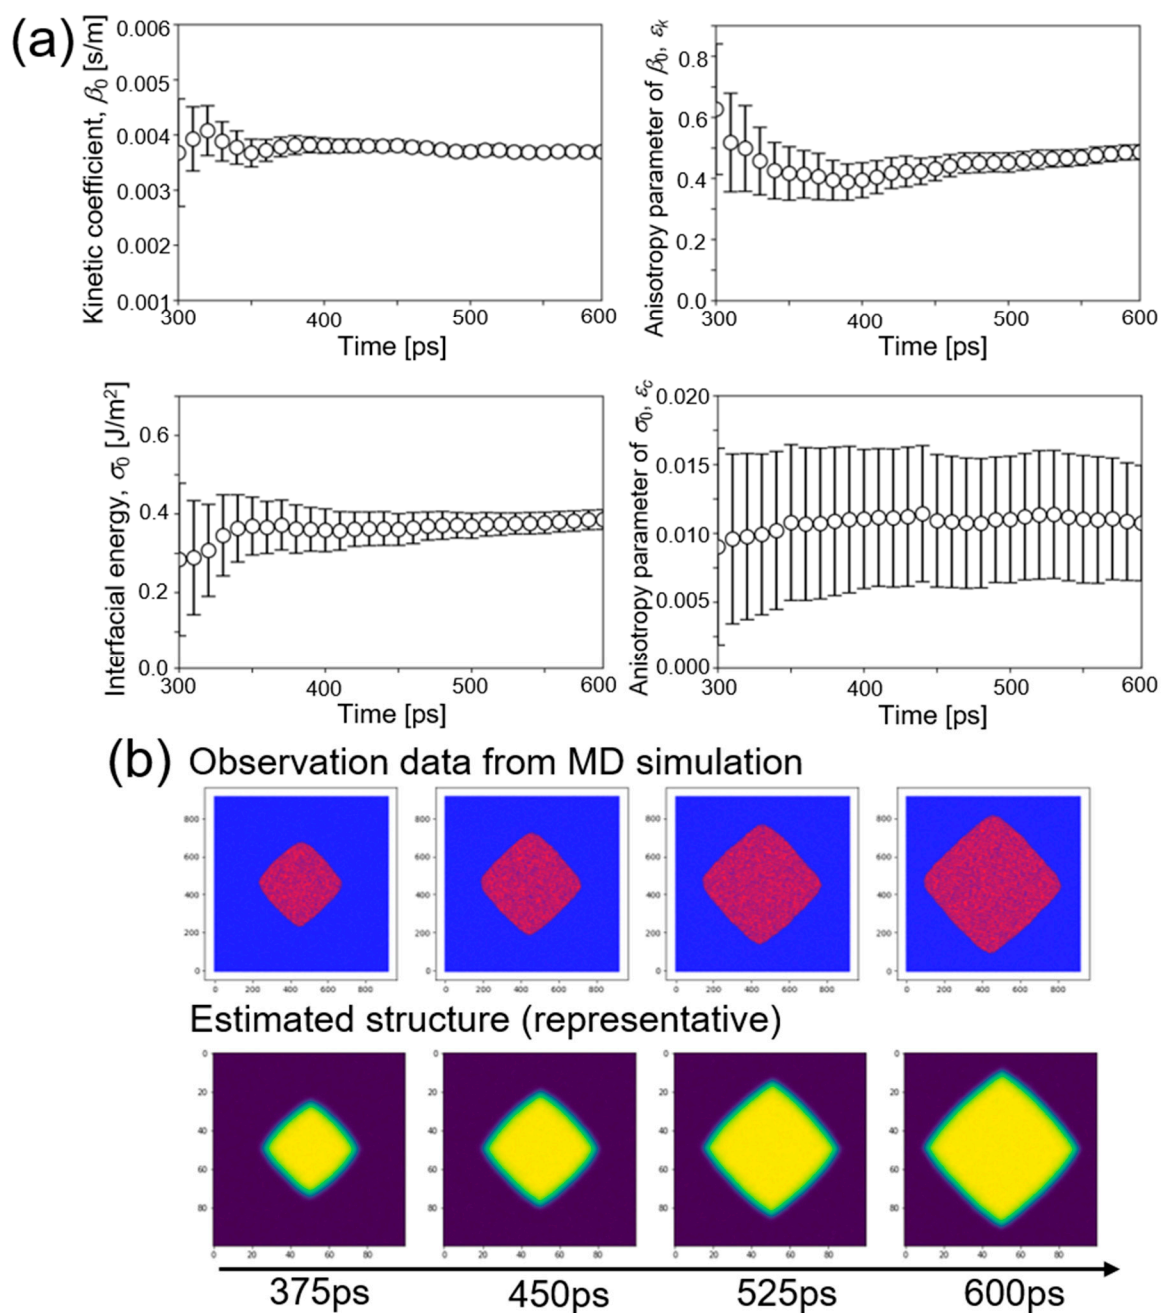

**Figure S1.** Estimation of four parameters (kinetic coefficient  $\beta$ , interfacial energy  $\sigma$ , and their anisotropy parameters  $\varepsilon_\beta$  and  $\varepsilon_\sigma$ ) using observation data of molecular dynamics (MD) simulation at 1455 K. (a) Time changes of the estimated values of four parameters,  $\beta$ ,  $\sigma$ ,  $\varepsilon_\beta$  and  $\varepsilon_\sigma$ . (b) Snapshots of observation data from MD simulation and representative result of estimated structure.

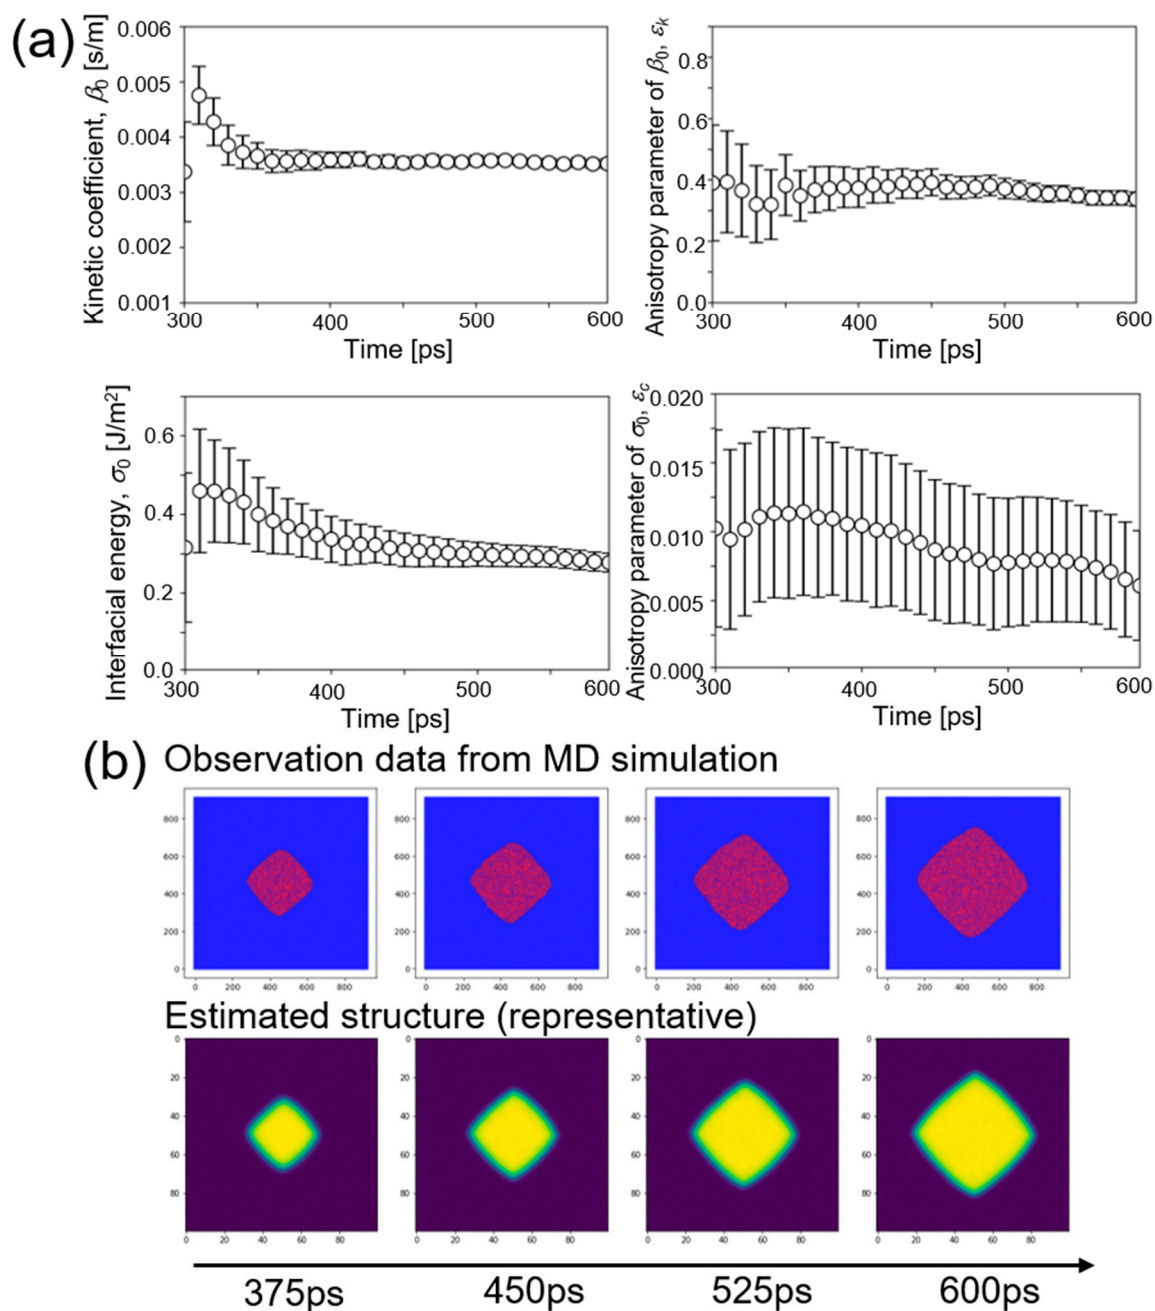

**Figure S2.** Estimation of four parameters (kinetic coefficient  $\beta_0$ , interfacial energy  $\sigma_0$ , and their anisotropy parameters  $\varepsilon_k$  and  $\varepsilon_\sigma$ ) using observation data of molecular dynamics (MD) simulation at 1505 K. (a) Time changes of the estimated values of four parameters,  $\beta_0$ ,  $\sigma_0$ ,  $\varepsilon_k$  and  $\varepsilon_\sigma$ . (b) Snapshots of observation data from MD simulation and representative result of estimated structure.

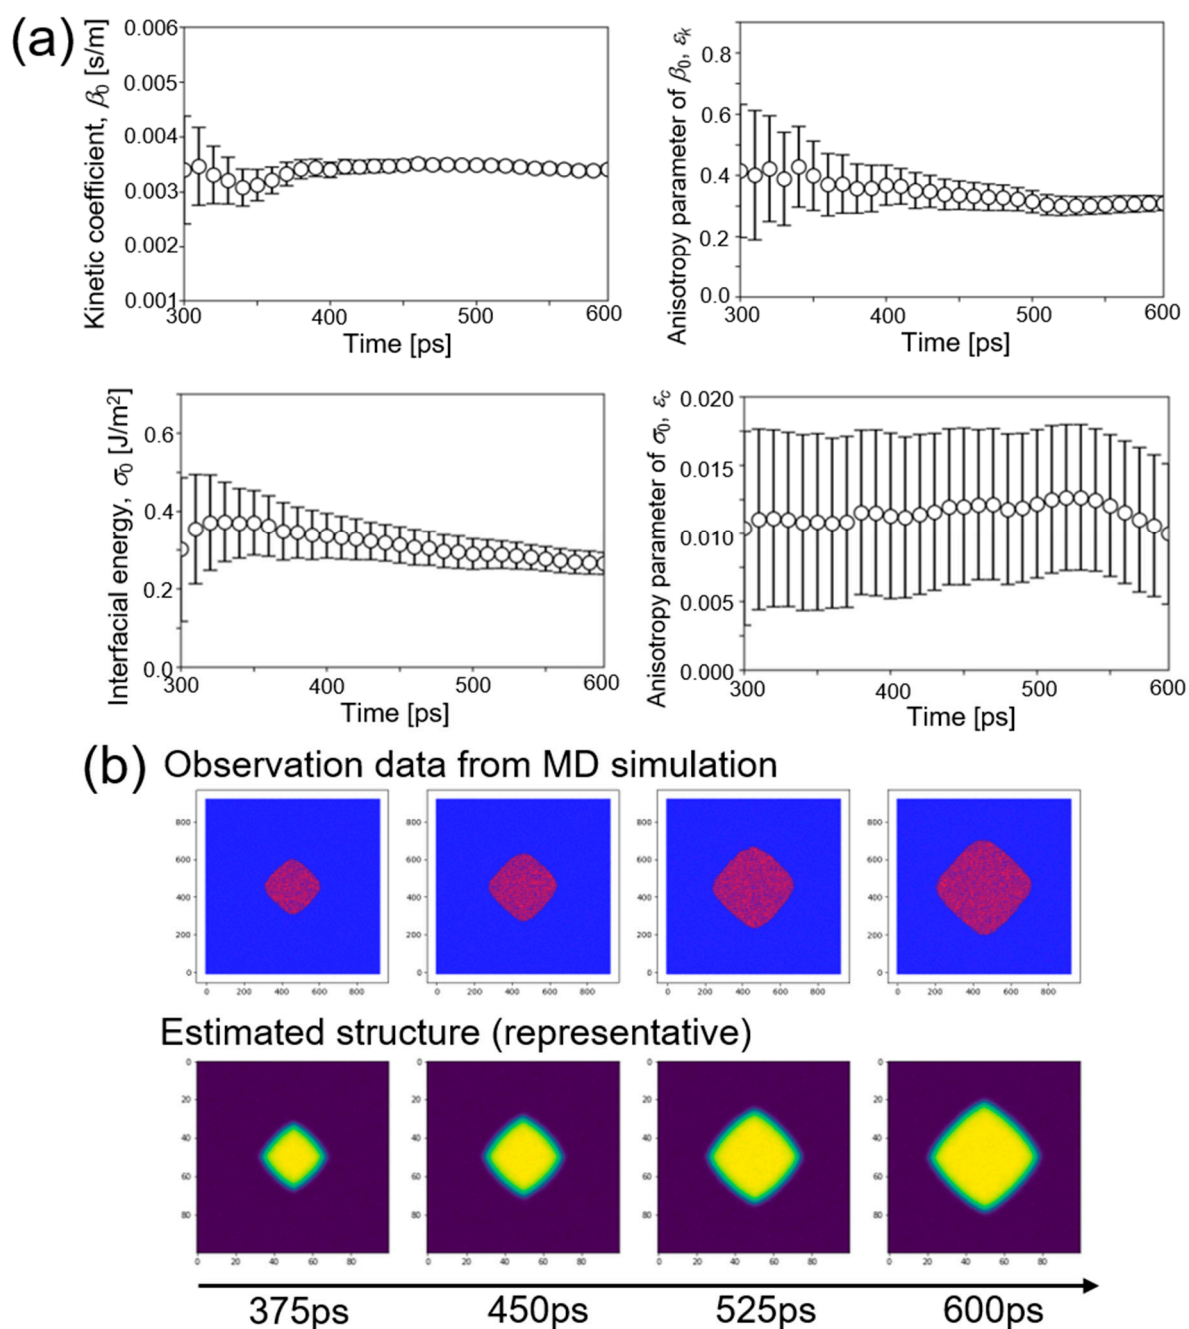

**Figure S3.** Estimation of four parameters (kinetic coefficient  $\beta$ , interfacial energy  $\sigma$ , and their anisotropy parameters  $\varepsilon$  and  $\varepsilon$ ) using observation data of molecular dynamics (MD) simulation at 1530 K. (a) Time changes of the estimated values of four parameters,  $\beta$ ,  $\sigma$ ,  $\varepsilon$  and  $\varepsilon$ . (b) Snapshots of observation data from MD simulation and representative result of estimated structure.

## References

1. Purja Pun, G.P.; Mishin, Y. Development of an interatomic potential for the Ni–Al system. *Philos. Mag.* **2009**, *89*, 3245–3267.
2. Mishin, Y. Atomistic modeling of the  $\gamma$  and  $\gamma'$ -phases of the Ni–Al system. *Acta Mater.* **2004**, *52*, 1451–1467.
